# Supplementary material for: Multi-layered Pt/Ni nanotube arrays with enhanced catalytic performance for methanol electrooxidation
Source: Royal Society of Chemistry journal article supplement (doi:10.1039/c5ta07098h), 2015-01-01
Supplement: c5ta07098h1.pdf [file c5ta07098h1.pdf]

## Supporting Information

### **Multi-Layered Pt/Ni Nanotube Arrays with Enhanced Catalytic Performance for Methanol Electrooxidation**

Sheng-Hua Ye, Jin-Xian Feng, An-Liang Wang, Han Xu and Gao-Ren Li\*

*MOE Laboratory of Bioinorganic and Synthetic Chemistry, KLGHEI of Environment and Energy Chemistry, School of Chemistry and Chemical Engineering, Sun Yat-sen University, Guangzhou 510275, China*

**Note after first publication: this version of the ESI published on 03/09/20 replaces the previous version published on 06/10/2015, in which there was an error in Figure S5.**

### **Experimental Section**

**Fabrication of ZnO nanorod arrays (NRAs) template.** All chemical reagents were analytical grade. Electrodeposition was carried out in a simple two-electrode electrolytic cell via galvanostatic electrodeposition, and the graphite electrode was used as a counter electrode (spectral grade, 1.8 cm<sup>2</sup>). The Ti plate (99.99%, 1.0 cm<sup>2</sup>) was used as a working electrode, and it was prepared complying the following steps before each experiment: firstly polished by SiC abrasive paper from 300 to 800 grits, then dipped in HCl solution (5%) for 10 min and rinsed with acetone in ultrasonic bath for 5 min, and finally washed by distilled water. The electrodeposition of ZnO NRAs was carried out on Ti substrate in 0.01 mol/L Zn(NO<sub>3</sub>)<sub>2</sub> + 0.05 mol/L NH<sub>4</sub>Cl solution at 0.4 mA/cm<sup>2</sup> at 70 °C for 1.5 h. SEM image of ZnO NRAs is shown in Figure S1.

**Synthesize of Pt/Ni MLNTAs.** The various Pt/Ni multi-layered nanotubes arrays (MLNTAs), such

as Ni@Pt NTAs, Ni@Pt@Ni@Pt NTAs, Pt@Ni@Pt NTAs, and Pt@Ni@Pt@Ni@Pt NTAs were fabricated by using ZnO NRAs as templates and layer-by-layer electrodeposition. Here Ni@Pt NTAs were used as an example to illustrate the fabrication of Pt/Ni MLNTAs. Electrodeposition of Ni layer was firstly carried out in solution of 0.01 M Ni(Ac)<sub>2</sub> + 0.05 M H<sub>3</sub>BO<sub>3</sub> + 0.05 M NH<sub>4</sub>Cl for 20 min at 0.25 mA/cm<sup>2</sup>, and accordingly ZnO@Ni NRAs were fabricated. Then the electrodeposition of Pt layer was carried out on the surfaces of ZnO@Ni NRAs in solution of 20 mM H<sub>2</sub>PtCl<sub>6</sub> + 0.5 M NaCl + 2.5 mM sodium citrate for 20 min at 0.25 mA/cm<sup>2</sup> and accordingly ZnO@Ni@Pt NRAs were fabricated. Finally, ZnO templates were removed by immersing the samples into NH<sub>3</sub>·H<sub>2</sub>O solution (10%) for 3 h and the Ni@Pt NTAs were successfully fabricated. Other Pt/Ni MLNTAs, such as Ni@Pt@Ni@Pt NTAs, Pt@Ni@Pt NTAs, and Pt@Ni@Pt@Ni@Pt NTAs were fabricated by the similar method. The details of the fabrication procedures of various Pt/Ni MLNTAs please see Scheme S1 and S2 in supporting information. For the comparative study, Pt NTAs were also synthesized by the similar route and their SEM image is shown in Figure S3 (here the electrodeposition of Pt layers on ZnO NRAs is 1h because of the lack of Ni layer).

**Structural characterization:** The morphologies of samples were characterized by field emission scanning electron microscopy (FE-SEM, JSM-6330F) and transmission electron microscopy (TEM, JEM-2010HR). Chemical-state analysis was determined by X-Ray photoelectron spectroscopy (XPS) using an ESCAKAB 250 X-Ray photoelectron spectrometer, all peaks corrected by C 1s line at 284.6eV as standard, and curve fitting and background subtraction were accomplished. Chemical component analysis was determined by inductively coupled plasma-atomic emission spectrometry (ICP-AES) using TJA IRIS(HR) spectrometer.

**Electrochemical characterization:** Electrochemical properties of the prepared electrocatalysts were

studied in a standard three-electrode electrolytic cell. The Pt NTAs, Ni@Pt NTAs, Pt@Ni@Pt NTAs, Ni@Pt@Ni @Pt NTAs and Pt@Ni@Pt@Ni@Pt NTAs grown on Ti substrates served as the working electrodes, respectively. A Pt foil served as the counter electrode. A saturated calomel electrode (SCE) was used as the reference electrode. All potentials were the values *vs* SCE. Cyclic voltammetry (CV) and chronoamperometry were measured by using a CHI660D electrochemical workstation (CH instruments, Inc.). CVs were recorded between -0.20 and 1.00 V *vs* SCE at 50 mV/s. Chronoamperometry curves for methanol electrooxidation were recorded at 0.65 V. For CV and chronoamperometry measurements of methanol electrooxidation reactions, an aqueous solution of 0.5 M H<sub>2</sub>SO<sub>4</sub>+0.5 M CH<sub>3</sub>OH was utilized. All of the electrolyte solutions were purged with high purity N<sub>2</sub> for 10 min, and all the electrochemical measurements were carried out at room temperature.

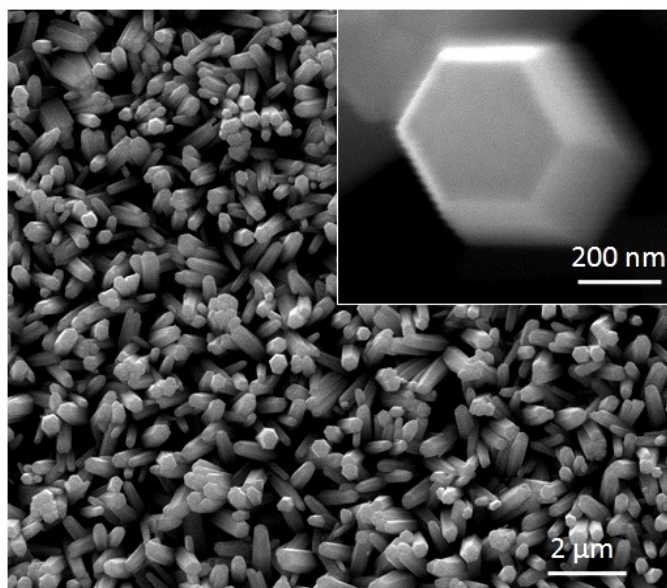

**Figure S1.** SEM image of ZnO NRAs.

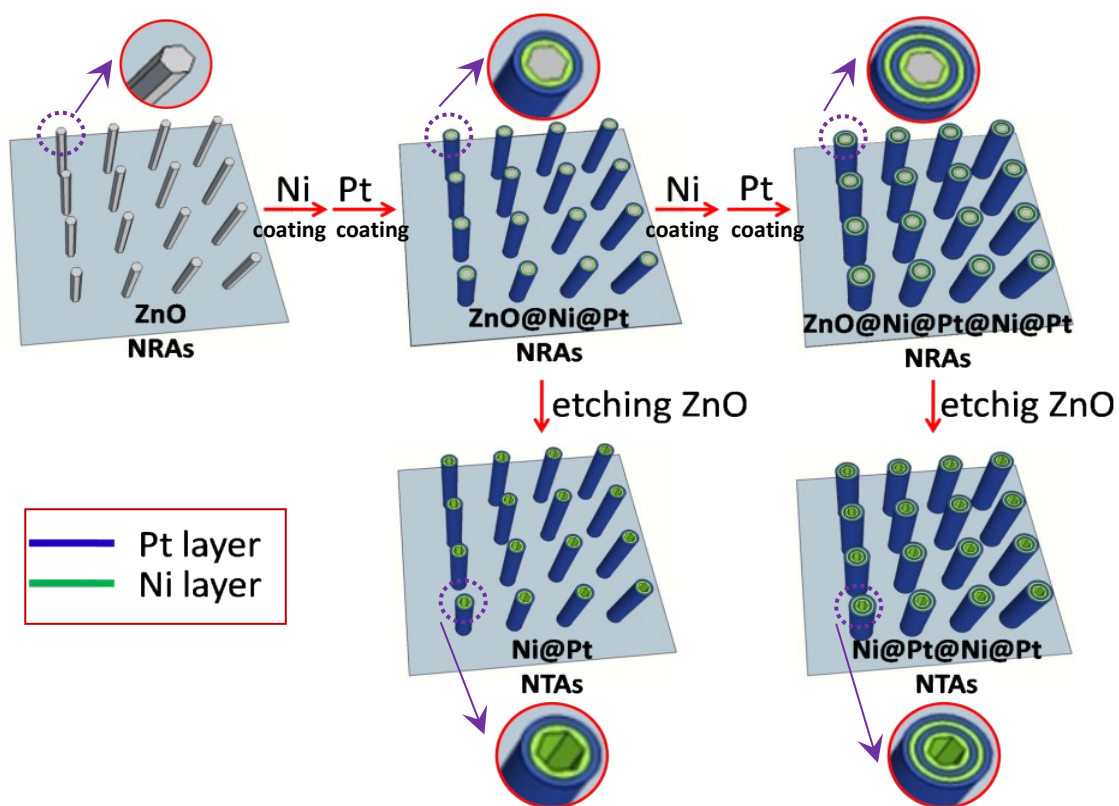

**Scheme S1.** Schematic illustration for template-assisted fabrication of Ni@Pt NTAs and Ni@Pt@Ni@Pt NTAs by layer-by-layer electrodeposition method.

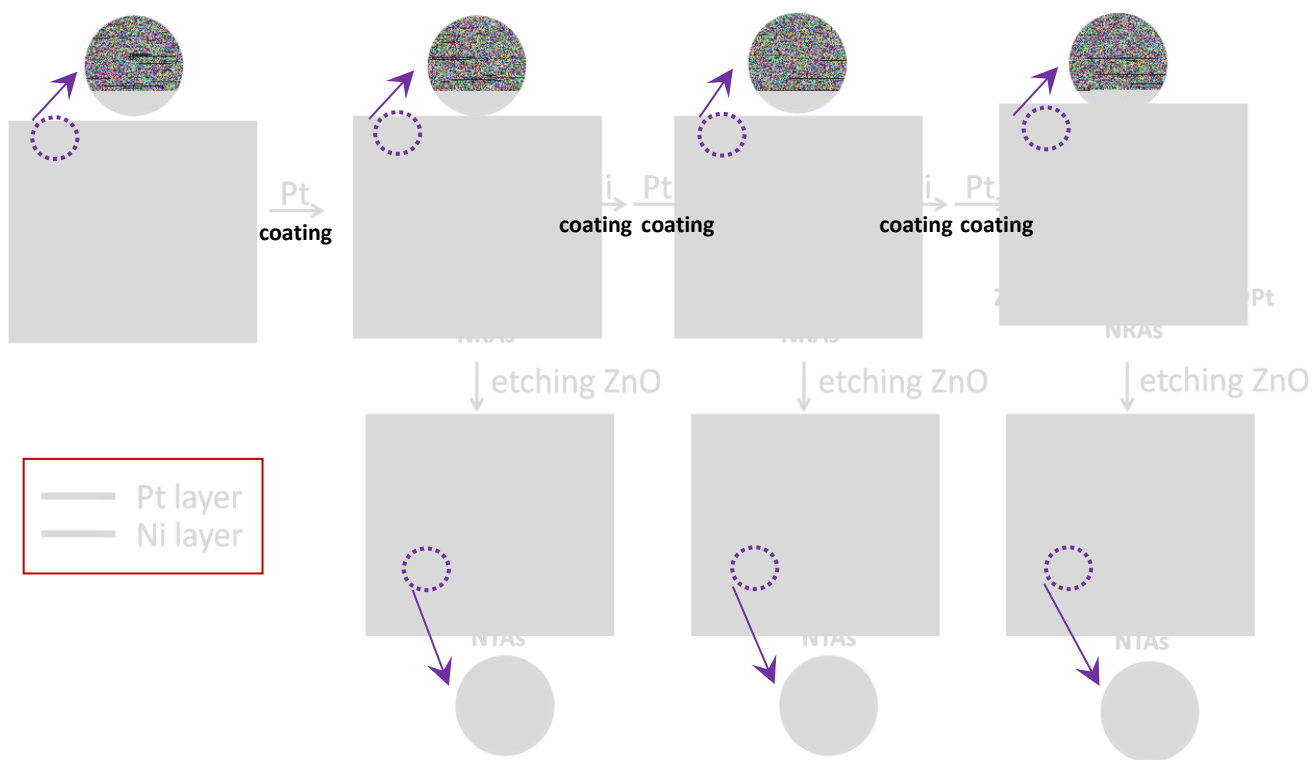

**Scheme S2.** Schematic illustration for template-assisted fabrication of Pt NTAs, Pt@Ni@Pt NTAs, and Pt@Ni@Pt@Ni@Pt NTAs by layer-by-layer electrodeposition method.

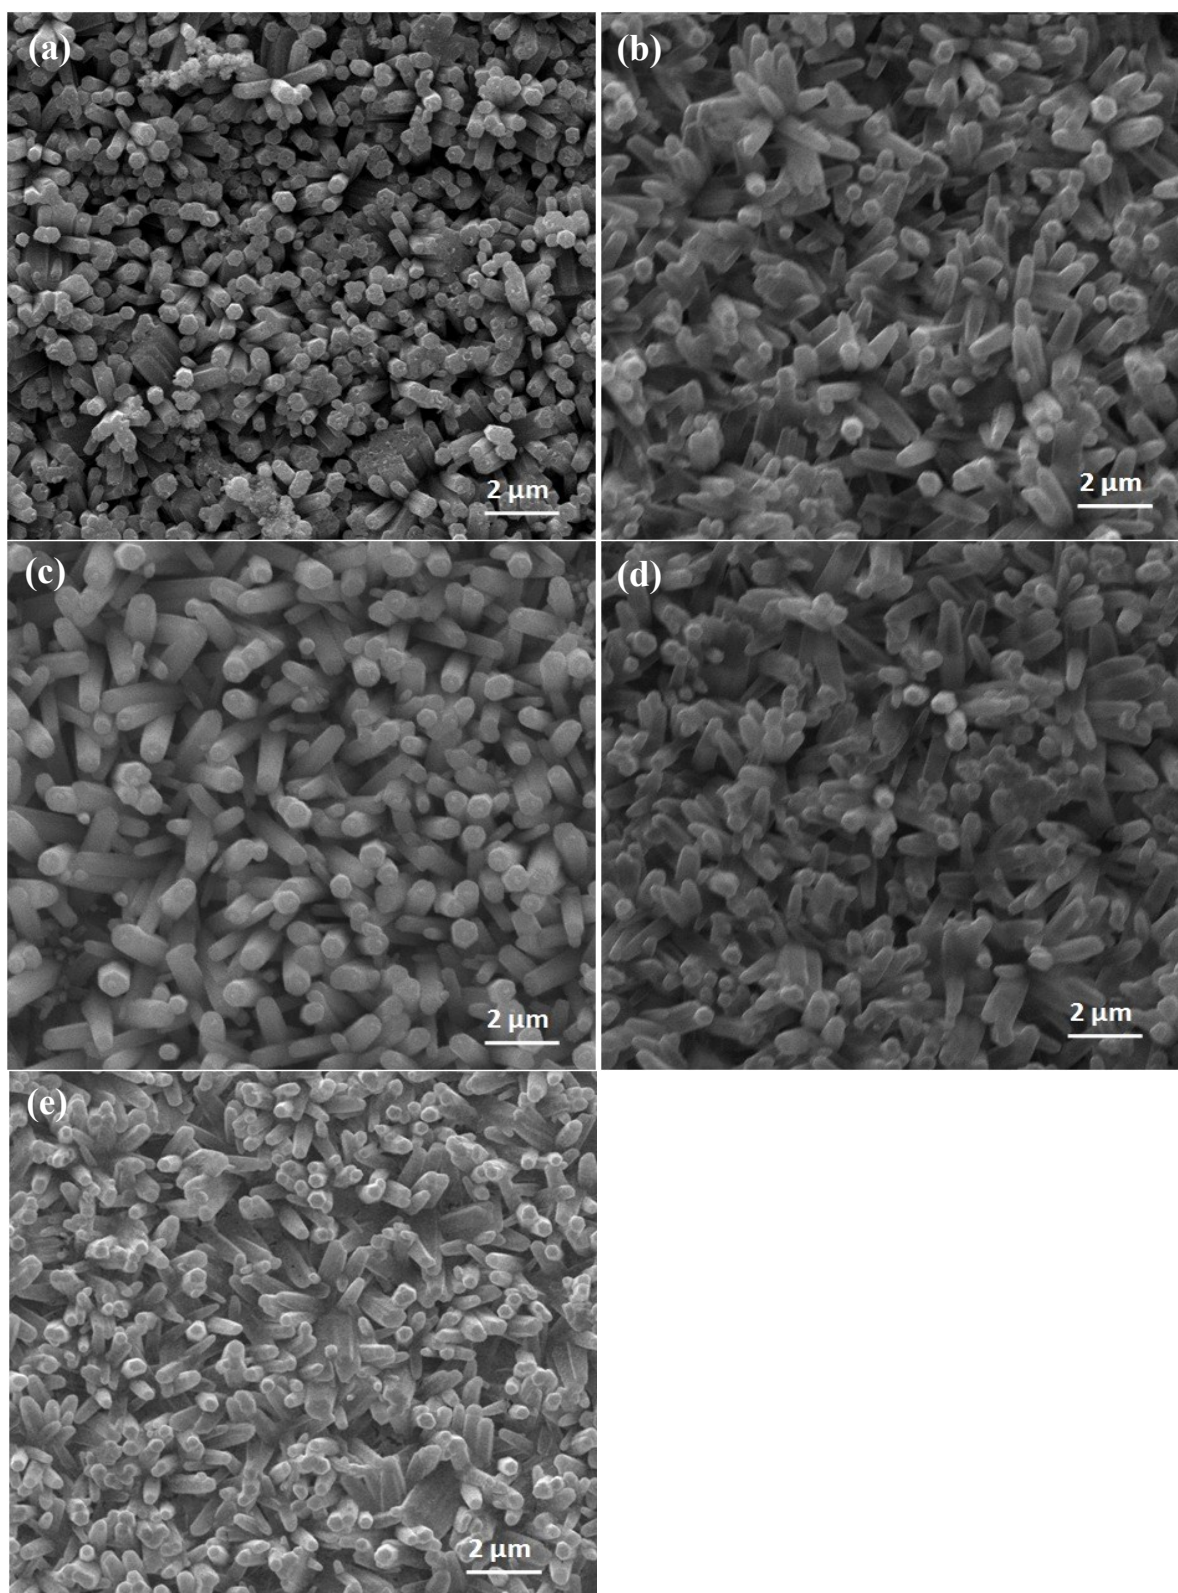

**Figure S2.** SEM images of (a) ZnO@Pt NRAs; (b) ZnO@Ni@Pt NRAs; (c) ZnO@Pt@Ni@Pt NRAs; (d) ZnO@Ni@Pt@Ni@Pt NRAs; and (e) ZnO@Pt@Ni@Pt@Ni@Pt NRAs.



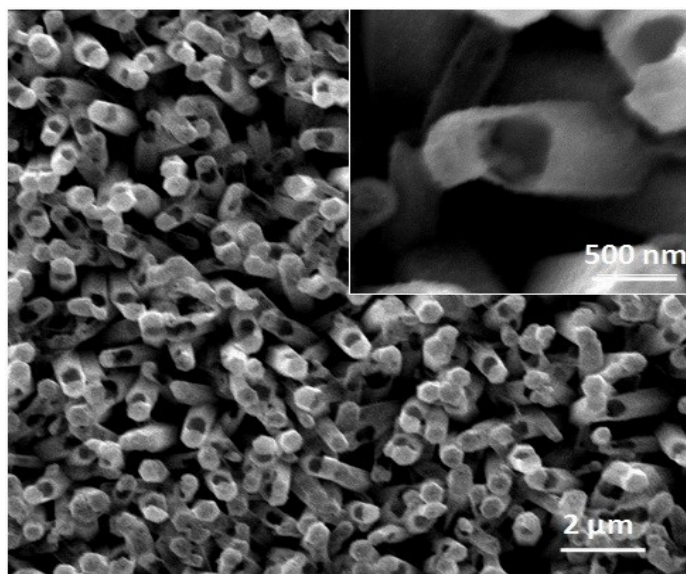

**Figure S3.** SEM image of Pt NTAs.

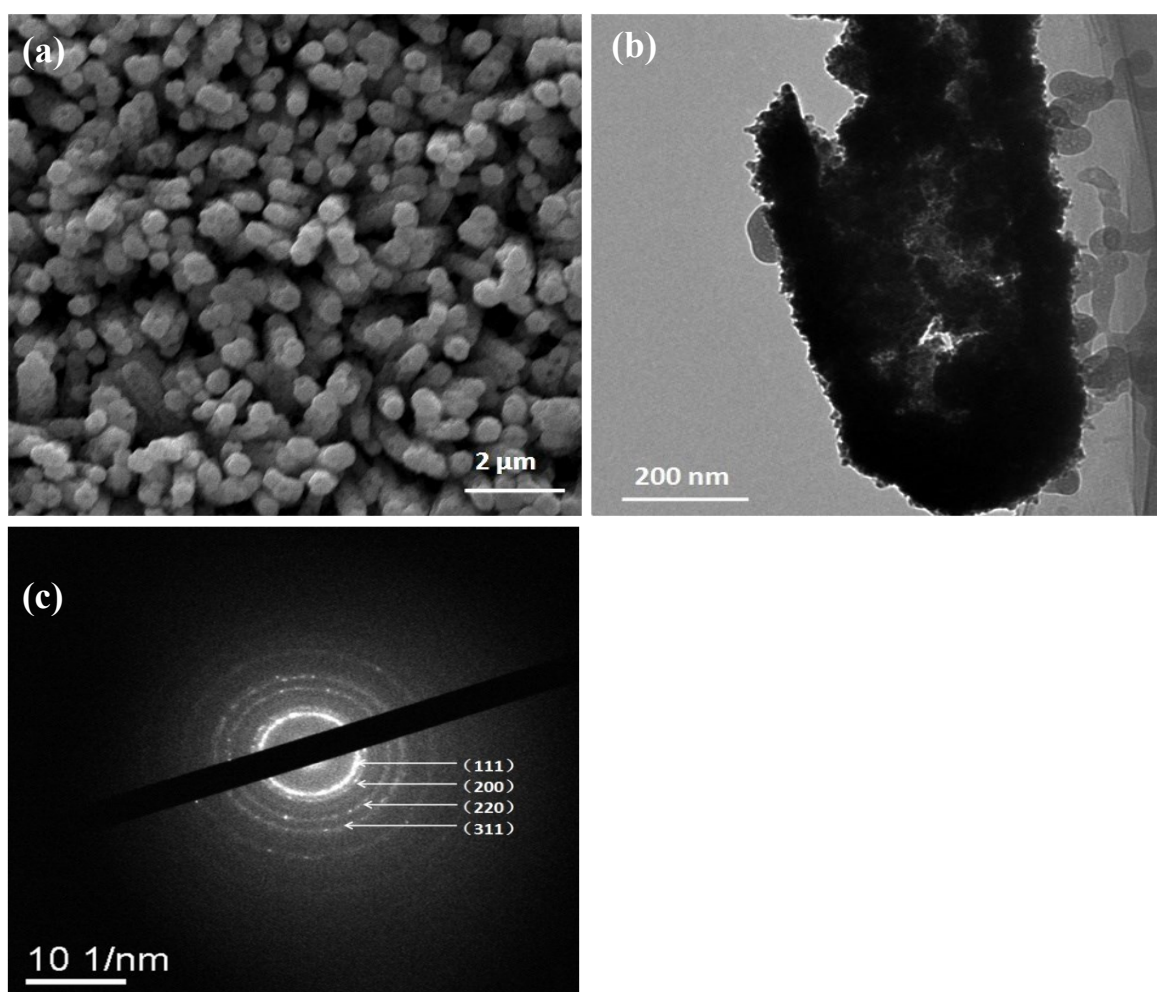

**Figure S4.** (a) SEM image, (b) TEM image and (c) SAED pattern of Ni nanotubes.

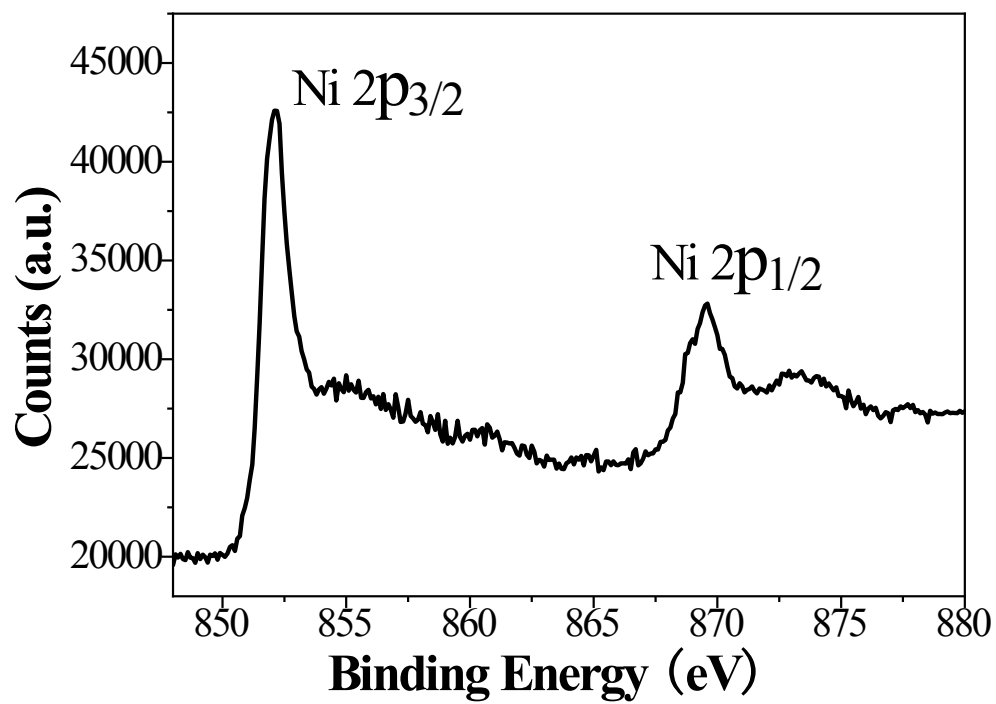

**Figure S5.** XPS spectra of Ni@Pt@Ni@Pt NTAs in Ni 2p region.



**Table S1.** Activity comparisons of Ni@Pt@Ni@Pt NTAs with other Pt-based electrocatalysts.

| Catalyst                                  | Mass activity<br>mA/mg <sub>pt</sub> | Testing condotions                                                       | Ref.                                               |
|-------------------------------------------|--------------------------------------|--------------------------------------------------------------------------|----------------------------------------------------|
| <b>Ni@Pt@Ni@Pt</b>                        | <b>362.7</b>                         | <b>0.5 M H<sub>2</sub>SO<sub>4</sub> + 0.5 M CH<sub>3</sub>OH 50mV/s</b> | <b>This work</b>                                   |
| <b>Mesoporous Pt/Pd</b>                   | ~280                                 | 0.5 M H <sub>2</sub> SO <sub>4</sub> + 0.5 M CH <sub>3</sub> OH 50mV/s   | J. Am. Chem. Soc. <b>2012</b> , 134, 10819         |
| <b>Mesoporous Pt/Pd/Pt</b>                | ~320                                 |                                                                          |                                                    |
| <b>Pt-on-Pd</b>                           | 280                                  | 0.5 M H <sub>2</sub> SO <sub>4</sub> + 0.5 M CH <sub>3</sub> OH 50mV/s   | J. Am. Chem. Soc. <b>2011</b> , 133, 9674          |
| <b>Pt<sub>49</sub>Te<sub>51</sub></b>     | 249.8                                | 0.5 M H <sub>2</sub> SO <sub>4</sub> + 1 M CH <sub>3</sub> OH 20mV/s     | Angew. Cheme. <b>2013</b> , 125, 7620              |
| <b>Pt/[BMIM]BF<sub>4</sub>/CNT</b>        | 155                                  | 0.5 M H <sub>2</sub> SO <sub>4</sub> + 1 M CH <sub>3</sub> OH 20mV/s     | Adv. Funct. Mater. <b>2010</b> , 20, 3747          |
| <b>Pt-SiO<sub>2</sub></b>                 | 270                                  | 1 M H <sub>2</sub> SO <sub>4</sub> + 0.5 M CH <sub>3</sub> OH 100mV/s    | ACS Appl. Mater. Interfaces <b>2015</b> , 7, 6590  |
| <b>PtSn/C</b>                             | 250                                  | 0.1 M NaOH + 0.5 M CH <sub>3</sub> OH 20mV/s                             | ACS Appl. Mater. Interfaces <b>2015</b> , 7, 15061 |
| <b>Pt<sub>20</sub>/C</b>                  | 220                                  | 0.5 M H <sub>2</sub> SO <sub>4</sub> + 0.5 M CH <sub>3</sub> OH          | J. Mater. Chem. A. <b>2015</b> , 3, 18010          |
| <b>Pt<sub>40</sub>/C</b>                  | 336                                  | 50mV/s                                                                   |                                                    |
| <b>Pt/RGO<sub>Na</sub>-BH<sub>3</sub></b> | ~260                                 | 0.5 M H <sub>2</sub> SO <sub>4</sub> + 0.5 M CH <sub>3</sub> OH 50mV/s   | Chem. Commun. <b>2015</b> , 51, 2418               |
| <b>Pt-sphere</b>                          | ~220                                 | 0.5 M H <sub>2</sub> SO <sub>4</sub> + 1 M CH <sub>3</sub> OH 50mV/s     | J. Mater. Chem. A <b>2014</b> , 2, 13738           |
| <b>Pt/thermal exfoliated graphene</b>     | ~300                                 | 0.5 M H <sub>2</sub> SO <sub>4</sub> + 2 M CH <sub>3</sub> OH 50mV/s     | Carbon <b>2011</b> , 49, 904                       |
| <b>Pt/N-doped graphene</b>                | 135                                  | 0.5 M H <sub>2</sub> SO <sub>4</sub> + 0.5 M CH <sub>3</sub> OH 20mV/s   | Chem. Mater. <b>2009</b> , 22, 832                 |
| <b>PtIr/CNT</b>                           | 311                                  | 0.5 M H <sub>2</sub> SO <sub>4</sub> + 0.5 M CH <sub>3</sub> OH 50mV/s   | J. Mater. Chem. <b>2012</b> , 22, 19658            |
| <b>PdPt/graphene</b>                      | 198                                  | 0.1 M HClO <sub>4</sub> + 1 M CH <sub>3</sub> OH 50mV/s                  | J. Phys. Chem. C <b>2013</b> , 117, 2926           |
| <b>Pt/MC/graphene</b>                     | 81.6                                 | 0.5 M H <sub>2</sub> SO <sub>4</sub> + 0.5 M CH <sub>3</sub> OH 50mV/s   | Electrochim. Acta. <b>2013</b> , 90, 283           |
| <b>Pt/N-doped CNT</b>                     | 103                                  | 0.5 M H <sub>2</sub> SO <sub>4</sub> + 1 M CH <sub>3</sub> OH 20mV/s     | J. Mater. Chem. <b>2012</b> , 22, 13578            |
| <b>Pt/Sn-modified CNT</b>                 | 91                                   | 0.5 M H <sub>2</sub> SO <sub>4</sub> + 1 M CH <sub>3</sub> OH 50mV/s     | Chem. –Eur. J. <b>2010</b> , 16, 829               |
| <b>Pt/CeO<sub>2</sub> graphene</b>        | 366                                  | 0.5 M H <sub>2</sub> SO <sub>4</sub> + 1 M CH <sub>3</sub> OH 100mV/s    | Chem. Commun. <b>2012</b> , 48, 2885               |
| <b>Pt-Co NWs</b>                          | ~260                                 | 0.5 M H <sub>2</sub> SO <sub>4</sub> + 1 M CH <sub>3</sub> OH 50mV/s     | Energy. Environ. Sci. <b>2011</b> , 4,             |



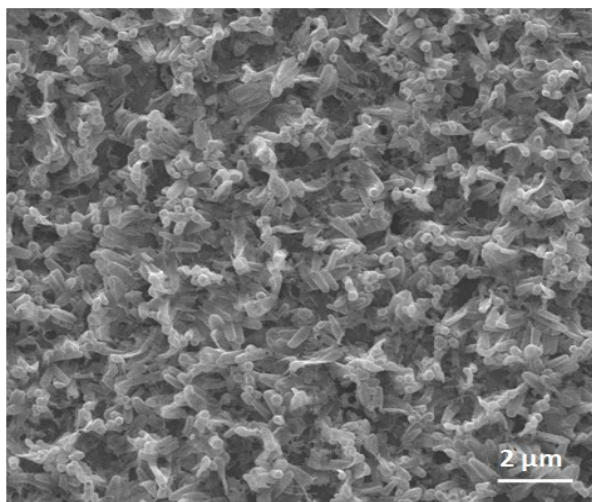

**Figure S6.** SEM image of Ni@Pt@Ni@Pt NTAs after the electrocatalytic process.

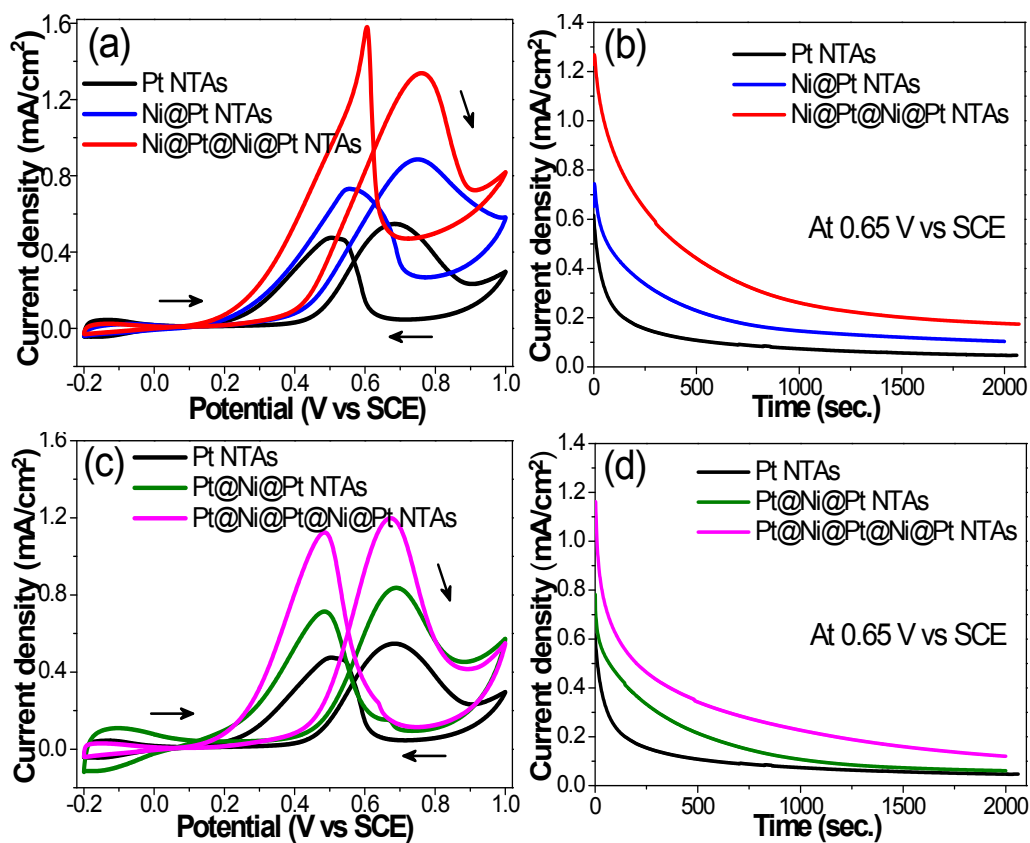

**Figure S7.** (a) CVs and (b) chronoamperometry curves of Pt NTAs, Ni@Pt NTAs and Ni@Pt@Ni@Pt NTAs in solution of 0.5 M H<sub>2</sub>SO<sub>4</sub>+0.5 M CH<sub>3</sub>OH at 50 mV/s; (c) CVs and (d) chronoamperometry curves of Pt NTAs, Pt@Ni@Pt NTAs and Pt@Ni@Pt@Ni@Pt NTAs in solution of 0.5 M H<sub>2</sub>SO<sub>4</sub>+0.5 M CH<sub>3</sub>OH at 50 mV/s (the current densities all are normalized to ECSA).

**Table S2.** ECSA and specific activity comparisons of Pt NTAs, Ni@Pt NTAs, Ni@Pt@Ni@Pt NTAs, Pt@Ni@Pt NTAs, and Pt@Ni@Pt@Ni@Pt NTAs (Data comes from Figure 3 in paper and Figure S7 in supporting information).

| Sample              | Pt loading (mg) | Specific activity (mA/mg <sub>Pt</sub> ) | Specific activity (mA/cm <sup>2</sup> <sub>ECSA</sub> ) |
|---------------------|-----------------|------------------------------------------|---------------------------------------------------------|
| Pt NTAs             | 0.1327          | 158.2                                    | 0.55                                                    |
| Ni@Pt NTAs          | 0.0562          | 249.3                                    | 0.88                                                    |
| Ni@Pt@Ni@Pt NTAs    | 0.0965          | 362.7                                    | 1.34                                                    |
| Pt@Ni@Pt NTAs       | 0.0920          | 228.3                                    | 0.84                                                    |
| Pt@Ni@Pt@Ni@Pt NTAs | 0.1505          | 315.0                                    | 1.20                                                    |
